# Supplementary material for: Exploring Secondary Metabolites in Coffee and Tea Food Wastes
Source: MDPI journal article supplement (doi:10.3390/horticulturae7110443), 2021-11-01
Supplement: s1 [file s1]

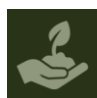

## Supplementary Materials

**Table S1.** Caffeine content (mean  $\pm$  SE, in mg/g) and decrease (%) in coffees and teas during successive extractions with different solvents (W: water; M: methanol; W:M water:methanol mix). Different letters in the table indicate statistical significance ( $p \leq 0.05$ ) in caffeine content between solvents.

|                  | Caffeine content - First extraction (mg/g) |                   |                   | Caffeine content - Second extraction (mg/g) |                  |                   | Decrease (%) |            |             |
|------------------|--------------------------------------------|-------------------|-------------------|---------------------------------------------|------------------|-------------------|--------------|------------|-------------|
|                  | W                                          | M                 | W:M               | W                                           | M                | W:M               | W            | M          | W:M         |
| <i>Teas</i>      |                                            |                   |                   |                                             |                  |                   |              |            |             |
| <b>Green tea</b> | 16.62 $\pm$ 1.4 a                          | 12.97 $\pm$ 0.4 b | 16.02 $\pm$ 0.8 a | 2.22 $\pm$ 0.6 a                            | 2.40 $\pm$ 0.2 a | 1.77 $\pm$ 0.2 a  | 86 $\pm$ 5   | 81 $\pm$ 2 | 89 $\pm$ 2  |
| <b>Black tea</b> | 26.80 $\pm$ 4.6 a                          | 9.90 $\pm$ 0.9 b  | 30.94 $\pm$ 1.8 a | 12.02 $\pm$ 4.1 a                           | 3.20 $\pm$ 0.4 b | 10.09 $\pm$ 1.6 a | 54 $\pm$ 18  | 67 $\pm$ 6 | 67 $\pm$ 7  |
| <b>Mate tea</b>  | 8.07 $\pm$ 2.3 a                           | 6.17 $\pm$ 0.4 b  | 6.48 $\pm$ 0.5 b  | 1.85 $\pm$ 0.7 b                            | 1.17 $\pm$ 0.5 b | 3.82 $\pm$ 0.2 a  | 74 $\pm$ 18  | 81 $\pm$ 9 | 41 $\pm$ 4  |
| <i>Coffees</i>   |                                            |                   |                   |                                             |                  |                   |              |            |             |
| <b>Instant</b>   | 34.82 $\pm$ 2.5 a                          | 30.01 $\pm$ 2.3 b | 23.06 $\pm$ 2.7 c | -                                           | -                | -                 | -            | -          | -           |
| <b>Ground</b>    | 9.57 $\pm$ 2.7 a                           | 8.04 $\pm$ 0.3 ab | 6.99 $\pm$ 1.7 b  | 4.17 $\pm$ 1.0 a                            | 3.33 $\pm$ 0.3 a | 5.17 $\pm$ 1.0 a  | 50 $\pm$ 32  | 59 $\pm$ 4 | 20 $\pm$ 33 |
| <b>Intense</b>   | 15.56 $\pm$ 1.8 a                          | 7.17 $\pm$ 0.6 c  | 11.64 $\pm$ 2.4 b | 3.59 $\pm$ 0.9 a                            | 2.69 $\pm$ 0.4 a | 4.86 $\pm$ 1.6 a  | 77 $\pm$ 8   | 63 $\pm$ 4 | 54 $\pm$ 29 |

**Table S2.** Phenolic compounds content (mean  $\pm$  SE, in mg/kg) and decrease (%) in green tea during successive extractions with different solvents (W: water, M: methanol; W:M water:methanol mix). Different letters in the table indicate statistical significance ( $p \leq 0.05$ ) in phenolic content between solvents.

|                            | First extraction (mg/kg) |                    |                     | Second extraction (mg/kg) |                    |                   | DECREASE (%) |    |     |
|----------------------------|--------------------------|--------------------|---------------------|---------------------------|--------------------|-------------------|--------------|----|-----|
|                            | W                        | M                  | W:M                 | W                         | M                  | W:M               | W            | M  | W:M |
| <i>Flavanols</i>           |                          |                    |                     |                           |                    |                   |              |    |     |
| Procyanidin dimer 1        | 1.39 $\pm$ 0.11 ab       | 1.04 $\pm$ 0.22 b  | 1.58 $\pm$ 0.09 a   | 0.72 $\pm$ 0.19 a         | 0.31 $\pm$ 0.12 ab | 0.21 $\pm$ 0.08 b | 48           | 70 | 87  |
| Procyanidin dimer 2        | 13.39 $\pm$ 0.41 a       | 11.95 $\pm$ 0.22 b | 12.51 $\pm$ 0.44 ab | 10.39 $\pm$ 0.94 a        | 9.82 $\pm$ 0.76 a  | 8.86 $\pm$ 0.44 a | 22           | 18 | 29  |
| Procyanidin dimer 3        | 1.68 $\pm$ 0.19 a        | 1.25 $\pm$ 0.16 a  | 1.8 $\pm$ 0.06 a    | 0.43 $\pm$ 0.06 ab        | 0.23 $\pm$ 0.07 b  | 0.24 $\pm$ 0.05 a | 74           | 82 | 87  |
| Epigallocatechin 1         | 0.45 $\pm$ 0.03 b        | 0.42 $\pm$ 0.03 b  | 0.54 $\pm$ 0.02 a   | 0.14 $\pm$ 0.04 a         | 0.13 $\pm$ 0.02 a  | 0.08 $\pm$ 0.02 a | 69           | 69 | 85  |
| Epigallocatechin 2         | 1.17 $\pm$ 0.07 a        | 0.81 $\pm$ 0.13 b  | 1.42 $\pm$ 0.02 a   | 0.22 $\pm$ 0.05 a         | 0.17 $\pm$ 0.01 a  | 0.18 $\pm$ 0.02 a | 81           | 79 | 87  |
| Gallocatechin              | 0.26 $\pm$ 0.02 a        | 0.16 $\pm$ 0.04 b  | 0.32 $\pm$ 0.01 a   | 0.09 $\pm$ 0.02 a         | 0.08 $\pm$ 0.02 a  | 0.04 $\pm$ 0.01 a | 65           | 50 | 88  |
| Epigallocatechin gallate 1 | 0.94 $\pm$ 0.03 a        | 0.84 $\pm$ 0.01 b  | 0.88 $\pm$ 0.03 ab  | 0.73 $\pm$ 0.06 a         | 0.69 $\pm$ 0.05 a  | 0.62 $\pm$ 0.03 a | 22           | 18 | 30  |
| Epigallocatechin gallate 2 | 2.05 $\pm$ 0.35 a        | 1.68 $\pm$ 0.38 a  | 1.88 $\pm$ 0.03 a   | 0.37 $\pm$ 0.06 a         | 0.35 $\pm$ 0.05 a  | 0.23 $\pm$ 0.02 a | 82           | 79 | 88  |
| Epigallocatechin gallate 3 | 4.8 $\pm$ 2.16 b         | 11.46 $\pm$ 2.04 a | 2.18 $\pm$ 0.06 b   | 2.19 $\pm$ 0.22 a         | 1.46 $\pm$ 0.3 ab  | 0.76 $\pm$ 0.04 b | 54           | 87 | 65  |
| Epigallocatechin gallate 4 | 0.55 $\pm$ 0.03 a        | 0.57 $\pm$ 0.03 a  | 0.64 $\pm$ 0.02 a   | 0.14 $\pm$ 0.01 a         | 0.11 $\pm$ 0.01 a  | 0.10 $\pm$ 0.01 a | 75           | 81 | 84  |
| Epicatechin gallate 1      | 0.004 $\pm$ 0.0005 c     | 0.02 $\pm$ 0.001 b | 0.04 $\pm$ 0.005 a  | traces                    | traces             | traces            |              |    |     |
| Epicatechin gallate 2      | traces                   | traces             | traces              | traces                    | traces             | traces            |              |    |     |

|                                        |                      |                      |                      |                      |                      |                      |           |           |           |
|----------------------------------------|----------------------|----------------------|----------------------|----------------------|----------------------|----------------------|-----------|-----------|-----------|
| Epicatechin gallate 3                  | 1.68 ± 0.12 a        | 1.78 ± 0.06 b        | 2.56 ± 0.09 b        | 0.46 ± 0.04 a        | 0.33 ± 0.01 b        | 0.34 ± 0.03 b        | 73        | 81        | 87        |
| Theaflavine                            | 1.12 ± 0.07 b        | 2.24 ± 0.034 b       | 2.01 ± 0.28 a        | 0.41 ± 0.05 a        | 0.28 ± 0.01 b        | 0.29 ± 0.02 b        | 63        | 88        | 86        |
| <b>Total flavanols</b>                 | <b>29.48 ± 3.6 b</b> | <b>34.22 ± 3.4 a</b> | <b>28.36 ± 1.2 b</b> | <b>16.29 ± 1.8 a</b> | <b>13.96 ± 1.5 b</b> | <b>11.95 ± 0.8 c</b> | <b>45</b> | <b>59</b> | <b>58</b> |
| <b>Flavonols</b>                       |                      |                      |                      |                      |                      |                      |           |           |           |
| Myricetin hexoside 1                   | 0.07 ± 0.006 b       | 0.08 ± 0.003 b       | 0.11 ± 0.009 a       | 0.03 ± 0.003 a       | 0.16 ± 0.0004 b      | 0.02 ± 0.001 b       | 57        | -100      | 82        |
| Myricetin hexoside 2                   | 0.08 ± 0.05 b        | 0.68 ± 0.02 c        | 1.12 ± 0.04 a        | 0.23 ± 0.02 a        | 0.16 ± 0.004 b       | 0.18 ± 0.011 b       | -188      | 76        | 84        |
| Quercetin hexoside rhamnoside hexoside | 0.87 ± 0.06 a        | 0.62 ± 0.002 b       | 1.19 ± 0.03 b        | 0.19 ± 0.02 ab       | 0.15 ± 0.16 b        | 0.19 ± 0.24 a        | 78        | 76        | 84        |
| Quercetin rhamnoside hexoside          | 0.22 ± 0.01 b        | 0.19 ± 0.01 b        | 0.34 ± 0.04 a        | 0.06 ± 0.017 a       | 0.05 ± 0.001 ab      | 0.05 ± 0.003 b       | 73        | 74        | 85        |
| Quercetin-3-rutinoside                 | 1.92 ± 0.13 b        | 1.59 ± 0.04 c        | 2.5 ± 0.08 a         | 0.57 ± 0.04 b        | 0.39 ± 0.01 c        | 0.45 ± 0.03 a        | 70        | 75        | 82        |
| Quercetin-3-galactoside                | 0.19 ± 0.03 b        | 0.23 ± 0.02 b        | 0.28 ± 0.04 a        | 0.08 ± 0.007 a       | 0.06 ± 0.06 b        | 0.05 ± 0.01 b        | 58        | 74        | 82        |
| Quercetin-3-glucoside                  | 0.04 ± 0.003 a       | 0.03 ± 0.004 a       | 0.04 ± 0.005 a       | 0.02 ± 0.004 a       | 0.007 ± 0.002 b      | 0.007 ± 0.001 b      | 50        | 77        | 83        |
| Kempferol-3-rutinoside                 | 0.14 ± 0.01 b        | 0.14 ± 0.004 b       | 0.20 ± 0.01 a        | 0.05 ± 0.005 a       | 0.04 ± 0.042 b       | 0.03 ± 0.042 b       | 64        | 71        | 85        |
| <b>Total flavonols</b>                 | <b>3.53 ± 0.3 b</b>  | <b>3.56 ± 0.1 b</b>  | <b>5.78 ± 0.3 a</b>  | <b>1.23 ± 0.1 a</b>  | <b>1.02 ± 0.3 b</b>  | <b>0.98 ± 0.3 b</b>  | <b>65</b> | <b>71</b> | <b>83</b> |
| <b>Phenolic acids</b>                  |                      |                      |                      |                      |                      |                      |           |           |           |
| 3- <i>p</i> -coumaroylquinic acid      | 0.04 ± 0.002 b       | 0.04 ± 0.002 b       | 0.05 ± 0.001 a       | 0.002 ± 0.0005 a     | 0.004 ± 0.0005 ab    | 0.003 ± 0.0005 b     | 95        | 90        | 94        |
| 3-caffeoylquinic acid                  | 0.009 ± 0.008 b      | 0.07 ± 0.01 b        | 0.14 ± 0.003 a       | 0.02 ± 0.004 a       | 0.01 ± 0.002 a       | 0.01 ± 0.0009 a      | -122      | 86        | 93        |
| 4-caffeoylquinic acid                  | 0.05 ± 0.002 a       | 0.05 ± 0.004 a       | 0.05 ± 0.001 a       | 0.01 ± 0.002 a       | 0.006 ± 0.0008 a     | 0.005 ± 0.0003 a     | 80        | 88        | 90        |
| 5-caffeoylquinic acid                  | 0.05 ± 0.006 b       | 0.04 ± 0.006 b       | 0.07 ± 0.002 a       | 0.02 ± 0.007 a       | 0.005 ± 0.001 a      | 0.008 ± 0.0006 a     | 60        | 88        | 89        |
| 5- <i>O</i> -galloylquinic acid        | 2.11 ± 0.26 a        | 1.08 ± 0.26 b        | 2.28 ± 0.05 a        | 1.28 ± 0.43 a        | 0.33 ± 0.08 b        | 0.28 ± 0.02 b        | 39        | 69        | 88        |
| Gallic acid                            | 0.22 ± 0.03 a        | 0.12 ± 0.03 b        | 0.24 ± 0.005 a       | 0.14 ± 0.05 a        | 0.03 ± 0.008 b       | 0.03 ± 0.003 b       | 36        | 75        | 88        |
| <b>Total phenolic acids</b>            | <b>2.48 ± 0.3 a</b>  | <b>1.40 ± 0.3 b</b>  | <b>2.83 ± 0.1 a</b>  | <b>1.47 ± 0.5 a</b>  | <b>0.39 ± 0.1 b</b>  | <b>0.34 ± 0.1 b</b>  | <b>41</b> | <b>72</b> | <b>88</b> |

**Table S3.** Phenolic compounds content (mean ± SE, in mg/kg) and decrease (%) in black tea during successive extractions with different solvents (W: water, M: methanol; W:M water:methanol mix). Different letters in the table indicate statistical significance ( $p \leq 0.05$ ) in phenolic content between solvents.

|                  | First extraction (mg/kg) |               |               | Second extraction (mg/kg) |               |               | DECREASE (%) |    |     |
|------------------|--------------------------|---------------|---------------|---------------------------|---------------|---------------|--------------|----|-----|
|                  | W                        | M             | W:M           | W                         | M             | W:M           | W            | M  | W:M |
| <b>Flavanols</b> |                          |               |               |                           |               |               |              |    |     |
| Epicatechin      | 4.08 ± 0.29 a            | 0.60 ± 0.02 b | 4.17 ± 0.13 a | 0.85 ± 0.29 a             | 0.16 ± 0.02 b | 0.94 ± 0.10 a | 79           | 73 | 77  |

|                                              |                          |                     |                      |                     |                     |                      |           |           |           |
|----------------------------------------------|--------------------------|---------------------|----------------------|---------------------|---------------------|----------------------|-----------|-----------|-----------|
| Catechin                                     | 0.35 ± 0.34<br>b         | 0.05 ± 0.006 b      | 0.33 ± 0.008<br>a    | 0.06 ± 0.01 a       | 0.01 ± 0.001<br>b   | 0.05 ± 0.008 a       | 83        | 80        | 85        |
| Epigallocatechin 1                           | 0.42 ± 0.05<br>b         | 0.14 ± 0.02 c       | 0.49 ± 0.01 a        | 0.07 ± 0.02 a       | 0.04 ± 0.02 a       | 0.09 ± 0.005 a       | 83        | 71        | 82        |
| Gallocatechin                                | 1.33 ± 0.12 a            | 0.37 ± 0.01 b       | 1.17 ± 0.03 a        | 0.32 ± 0.32 a       | 0.12 ± 0.19 b       | 0.46 ± 0.46 a        | 76        | 68        | 61        |
| Epigallocatechin gallate                     | 2.88 ± 0.14 a            | 0.59 ± 0.04 b       | 2.84 ± 0.05 a        | 0.39 ± 0.11 a       | 0.16 ± 0.02 b       | 0.32 ± 0.04<br>ab    | 86        | 73        | 89        |
| Epicatechin gallate 1                        | 0.89 ± 0.08<br>b         | 0.16 ± 0.02 c       | 1.13 ± 0.47 a        | 0.20 ± 0.07 a       | 0.03 ± 0.002<br>b   | 0.17 ± 0.03 a        | 78        | 81        | 85        |
| Epicatechin gallate 2                        | traces                   | traces              | traces               | traces              | traces              | traces               |           |           |           |
| Gallocatechin gallate                        | 0.59 ± 0.04<br>b         | 0.26 ± 0.01 b       | 0.58 ± 0.03 a        | 0.13 ± 0.04 a       | 0.09 ± 0.01 a       | 0.12 ± 0.01 a        | 78        | 65        | 79        |
| Theaflavine                                  | 1.11 ± 0.93 a            | 0.57 ± 0.23 b       | 1.34 ± 0.02 a        | 0.51 ± 0.83 b       | 0.11 ± 0.15 b       | 0.17 ± 0.38 b        | 54        | 81        | 87        |
| Theaflavine-3,3'-digallate                   | 0.84 ± 0.06<br>b         | 0.68 ± 0.05 b       | 1.38 ± 0.61 a        | 0.31 ± 0.09 a       | 0.13 ± 0.01 a       | 0.13 ± 0.06 a        | 63        | 81        | 91        |
| Theaflavine-3-gallate                        | 0.77 ± 0.06<br>b         | 0.53 ± 0.03 c       | 1.18 ± 0.05 a        | 0.37 ± 0.06 a       | 0.09 ± 0.008<br>b   | 0.15 ± 0.04 b        | 52        | 83        | 87        |
| <b>Total flavanols</b>                       | <b>13.26 ± 2.1<br/>b</b> | <b>3.95 ± 0.4 c</b> | <b>14.61 ± 1.4 a</b> | <b>3.21 ± 1.8 a</b> | <b>0.94 ± 0.4 c</b> | <b>2.60 ± 1.1 ab</b> | <b>76</b> | <b>76</b> | <b>82</b> |
| <b>Flavonols</b>                             |                          |                     |                      |                     |                     |                      |           |           |           |
| Myricetin hexoside 1                         | 0.22 ± 0.02<br>b         | 0.05 ± 0.005 c      | 0.28 ± 0.01 a        | 0.08 ± 0.008<br>a   | 0.011 ±<br>0.0009 b | 0.07 ± 0.008 a       | 64        | 78        | 75        |
| Myricetin hexoside 2                         | 0.33 ± 0.07<br>b         | 0.091 ± 0.014 c     | 0.42 ± 0.03 a        | 0.11 ± 0.02 a       | 0.022 ± 0.001<br>b  | 0.12 ± 0.01 a        | 67        | 76        | 71        |
| Quercetin rhamnosil<br>hexoside dirhamnoside | 0.11 ± 0.03<br>b         | 0.11 ± 0.007 c      | 0.49 ± 0.008<br>a    | 0.13 ± 0.02 a       | 0.02 ± 0.001<br>b   | 0.11 ± 0.17 a        | -18       | 82        | 78        |
| Quercetin rhamnoside<br>hexoside             | traces                   | traces              | traces               | traces              | traces              | traces               |           |           |           |
| Quercetin-3-rutinoside                       | 2.03 ± 0.15<br>b         | 0.52 ± 0.02 c       | 2.39 ± 0.51 a        | 0.47 ± 0.06 a       | 0.11 ± 0.006<br>b   | 0.41 ± 0.04 a        | 77        | 79        | 83        |
| Quercetin-3-galactoside                      | 0.87 ± 0.06<br>b         | 0.29 ± 0.001 c      | 1.14 ± 0.03 a        | 0.33 ± 0.04 a       | 0.08 ± 0.08 b       | 0.29 ± 0.38 a        | 62        | 72        | 75        |
| Quercetin-3-glucoside                        | 1.53 ± 0.11<br>b         | 0.53 ± 0.014 c      | 1.94 ± 0.05 a        | 0.25 ± 0.11 a       | 0.15 ± 0.006<br>b   | 0.49 ± 0.04 a        | 84        | 72        | 75        |
| Kaempferol-3-rutinoside                      | 0.72 ± 0.05<br>b         | 0.19 ± 0.008 c      | 0.87 ± 0.02 a        | 0.2 ± 0.02 a        | 0.04 ± 0.002<br>b   | 0.18 ± 0.018 a       | 72        | 79        | 79        |
| Kaempferol-3-galactoside                     | 0.45 ± 0.03 a            | 0.16 ± 0.07 b       | 0.68 ± 0.01 a        | 0.18 ± 0.02 a       | 0.04 ± 0.046<br>b   | 0.16 ± 0.02 a        | 60        | 75        | 76        |
| Kaempferol-3-glucoside                       | 0.95 ± 0.07<br>b         | 0.37 ± 0.04 c       | 1.31 ± 0.08 a        | 0.37 ± 0.05         | 0.10 ± 0.003<br>b   | 0.32 ± 0.03 a        | 61        | 73        | 76        |
| Kaempferol hexoside<br>rhamnoside            | 0.02 ± 0.002<br>b        | 0.006 ± 0.0005 c    | 0.04 ±<br>0.0009 a   | 0.008 ±<br>0.001 a  | 0.001 ±<br>0.0001 b | 0.006 ±<br>0.0008 a  | 60        | 83        | 85        |
| Kaempferol hexoside<br>trirhamnoside         | 0.15 ± 0.02<br>b         | 0.56 ± 0.005 c      | 0.24 ± 0.02 a        | 0.06 ± 0.01 a       | 0.01 ± 0.001<br>b   | 0.06 ± 0.008 a       | 60        | 98        | 75        |
| Kaempferol acetyl<br>hexoside                | 0.19 ± 0.02<br>b         | 0.06 ± 0.007 c      | 0.27 ± 0.008<br>a    | 0.07 ± 0.01         | 0.01 ± 0.001<br>b   | 0.06 ± 0.009 a       | 63        | 83        | 78        |
| <b>Total flavonols</b>                       | <b>7.57 ± 0.6 b</b>      | <b>2.94 ± 0.2 c</b> | <b>10.07 ± 0.8 a</b> | <b>2.26 ± 0.4 a</b> | <b>0.59 ± 0.1 b</b> | <b>2.28 ± 0.7 a</b>  | <b>70</b> | <b>80</b> | <b>77</b> |
| <b>Phenolic acids</b>                        |                          |                     |                      |                     |                     |                      |           |           |           |
| 3-p-coumaroylquinic acid                     | 0.39 ± 0.06 a            | 0.04 ± 0.002 c      | 0.33 ± 0.01 b        | 0.06 ± 0.008<br>a   | 0.02 ± 0.001 c      | 0.21 ± 0.01 a        | 85        | 50        | 36        |

|                             |                     |                     |                     |                     |                     |                     |           |           |           |
|-----------------------------|---------------------|---------------------|---------------------|---------------------|---------------------|---------------------|-----------|-----------|-----------|
| 4-coumaroylquinic acid      | 1.44 ± 0.09 a       | 0.29 ± 0.01 b       | 1.14 ± 0.22 a       | 0.15 ± 0.03 a       | 0.08 ± 0.004 b      | 0.15 ± 0.01 a       | 90        | 72        | 87        |
| 5-p-coumaroylquinic acid    | 0.09 ± 0.02 b       | 0.02 ± 0.002 c      | 0.30 ± 0.01 a       | 0.08 ± 0.01 a       | 0.004 ± 0.001 b     | 0.07 ± 0.01 a       | 11        | 80        | 77        |
| 3-caffeoylquinic acid 1     | 0.38 ± 0.03 a       | 0.53 ± 0.005 b      | 0.39 ± 0.009 a      | 0.09 ± 0.01 a       | 0.01 ± 0.0009 c     | 0.05 ± 0.006 b      | 76        | 98        | 87        |
| 3-caffeoylquinic acid 2     | 0.19 ± 0.01 a       | 0.02 ± 0.001 c      | 0.16 ± 0.01 b       | 0.03 ± 0.04 b       | 0.01 ± 0.0007 c     | 0.1 ± 0.007 a       | 84        | 50        | 38        |
| 4-caffeoylquinic acid       | 2.08 ± 0.11 a       | 0.44 ± 0.02 b       | 2 ± 0.05 a          | 0.30 ± 0.04 a       | 0.11 ± 0.008 b      | 0.22 ± 0.027 a      | 86        | 75        | 89        |
| 5-caffeoylquinic acid 1     | 0.58 ± 0.04 a       | 0.09 ± 0.01 b       | 0.59 ± 0.01 a       | 0.11 ± 0.002 a      | 0.11 ± 0.002 a      | 0.09 ± 0.01 a       | 81        | -22       | 85        |
| 5-caffeoylquinic acid 2     | 0.03 ± 0.002 b      | 0.005 ± 0.001 c     | 0.05 ± 0.002 a      | 0.01 ± 0.002 a      | 0.007 ± 0.0002 c    | 0.008 ± 0.001 b     | 67        | -40       | 84        |
| <b>Total phenolic acids</b> | <b>5.18 ± 0.4 a</b> | <b>1.44 ± 0.1 b</b> | <b>4.96 ± 0.3 a</b> | <b>0.83 ± 0.1 a</b> | <b>0.35 ± 0.0 b</b> | <b>0.90 ± 0.1 a</b> | <b>84</b> | <b>76</b> | <b>82</b> |

**Table S4.** Phenolic compounds content (mean ± SE, in mg/kg) and decrease (%) in mate tea during successive extractions with different solvents (W: water, M: methanol; W:M water:methanol mix). Different letters in the table indicate statistical significance ( $p \leq 0.05$ ) in phenolic content between solvents.

|                           | First extraction (mg/kg) |                    |       | Second extraction (mg/kg) |                    |     | DECREASE (%) |           |           |
|---------------------------|--------------------------|--------------------|-------|---------------------------|--------------------|-----|--------------|-----------|-----------|
|                           | W                        | M                  | W:M   | W                         | M                  | W:M | W            | M         | W:M       |
| <i>Flavonols</i>          |                          |                    |       |                           |                    |     |              |           |           |
| Quercetin-3-rutinoside    | 4.92 ± 1.11 a            | 3.86 ± 0.20        | ± ±   | 1.83 ± 0.11 b             | 0.77 ± 0.15        | ± ± | 63           | 80        | 25        |
|                           |                          | 0.19 ± 0.16        | a a   |                           | 0.26 ± 0.32        | c a |              |           |           |
| Quercetin-3-glucoside     | 0.67 ± 0.04 a            | 0.43 ± 0.45        | ± ±   | 0.17 ± 0.01 b             | 0.13 ± 0.32        | ± ± | 75           | 70        | 29        |
|                           |                          | 0.04 ± 0.02        | b b   |                           | 0.05 ± 0.32        | b a |              |           |           |
| Kaempferol-3-rutinoside   | 1.10 ± 0.06 b            | 0.69 ± 0.73        | ± ±   | 0.29 ± 0.01 a             | 0.14 ± 0.55        | ± ± | 74           | 80        | 25        |
|                           |                          | 0.04 ± 0.02        | b a   |                           | 0.03 ± 0.03        | b b |              |           |           |
| Isorhamnetin-3-rutinoside | 0.33 ± 0.02 b            | 0.19 ± 0.22        | ± ±   | 0.83 ± 0.005 a            | 0.02 ± 0.17        | ± ± | -152         | 89        | 23        |
|                           |                          | 0.02 ± 0.00        | c 9 a |                           | 0.02 ± 0.01        | b b |              |           |           |
| <b>Total flavonols</b>    | <b>7.02 ± 1.2 a</b>      | <b>5.17 ± 0.60</b> | ± ±   | <b>3.12 ± 0.1 b</b>       | <b>1.06 ± 0.19</b> | ± ± | <b>56</b>    | <b>79</b> | <b>25</b> |
|                           |                          | <b>0.3 ± 0.2</b>   | b b   |                           | <b>0.4 ± 0.7</b>   | c a |              |           |           |
| <i>Phenolic acids</i>     |                          |                    |       |                           |                    |     |              |           |           |
| 3-p-coumaroylquinic acid  | 4.18 ± 0.53 a            | 1.11 ± 0.72        | ± ±   | 0.81 ± 0.13 b             | 0.38 ± 0.53        | ± ± | 81           | 66        | 44        |
|                           |                          | 0.06 ± 0.07        | c b   |                           | 0.02 ± 0.58        | c a |              |           |           |
| 4-coumaroylquinic acid    | 0.09 ± 0.008 a           | 0.06 ± 0.04        | ± ±   | 0.02 ± 0.002 b            | 0.05 ± 0.05        | ± ± | 78           | 17        | -25       |

|                             |                      |                                                                    |                      |                                                                   |           |                       |
|-----------------------------|----------------------|--------------------------------------------------------------------|----------------------|-------------------------------------------------------------------|-----------|-----------------------|
|                             |                      | 0.000.00<br>9 b 3 b<br>6.8713.2                                    |                      | 0.010.00<br>a 5 a<br>7.5613.7                                     |           |                       |
| 3-caffeoylquinic acid       | 19 ± 2.28 a          | ± 6 ±<br>0.330.83<br>c b                                           | 23.64 ± 2.28 a       | ± 6 ±<br>0.330.34<br>c b                                          | -24       | -<br>10 <sup>-4</sup> |
| 4-caffeoylquinic acid       | 3.75 ± 0.45 a        | 1.08 2.5<br>± ±<br>0.140.15<br>c b                                 | 0.75 ± 0.13 b        | 0.371.44<br>± ±<br>0.030.01<br>c a                                | 80        | 66 42                 |
| 5-caffeoylquinic acid<br>1  | 0.04 ± 0.005 a       | 0.010.03<br>± ±<br>0.000.00<br>06 c06 b                            | 0.008 ± 0.001 b      | 0.00<br>4 4 0.01<br>± ±<br>0.00 0.00<br>03 c 01 a                 | 80        | 56 67                 |
| 5-caffeoylquinic acid<br>2  | 0.005 ± 2.83 a       | 0.000.00<br>3 ± 4 ±<br>4.168.45<br>b b                             | 0.0009 ± 0.0002 a    | 0.000.00<br>3 ± 2 ±<br>0.000.00<br>07 b02 a                       | 82        | 0 50                  |
| Dicaffeoylquinic acid<br>1  | 5.26 ± 0.23 d        | 1.492.78<br>± ±<br>0.130.07<br>c b                                 | 1.48 ± 0.07 b        | 0.381.80<br>± ±<br>0.080.09<br>c a                                | 72        | 74 35                 |
| Dicaffeoylquinic acid<br>2  | 17.0 ± 2.14 a        | 9.1711.7<br>± 9<br>0.05±0.3<br>b 0 b                               | 6.20 ± 0.57 b        | 1.897.63<br>± ±<br>0.290.34<br>c a                                | 64        | 79 35                 |
| Dicaffeoylquinic acid<br>3  | 8.44 ± 1.06 a        | 3.754.07<br>± ±<br>0.221.25<br>b b                                 | 3.86 ± 0.36 a        | 0.913.95<br>± ±<br>0.140.18<br>b a                                | 54        | 76 3                  |
| Dicaffeoylquinic acid<br>4  | 0.76 ± 0.06 a        | 0.410.48<br>± ±<br>0.080.03<br>b b                                 | 0.21 ± 0.01 ab       | 0.130.29<br>± ±<br>0.050.03<br>a b                                | 72        | 68 40                 |
| 3-feruloylquinic acid       | 0.15 ± 0.02 a        | 0.04 0.1<br>± ±<br>0.000.00<br>6 c 6 b                             | 0.03 ± 0.005 b       | 0.010.06<br>± ±<br>0.000.00<br>1 c 06 a                           | 80        | 75 40                 |
| 4-feruloylquinic acid       | 0.21 ± 0.01 a        | 0.120.13<br>± ±<br>0.010.00<br>b 5 b                               | 0.04 ± 0.005 b       | 0.080.08<br>± ±<br>0.000.00<br>2 a 4 a                            | 81        | 33 38                 |
| <b>Total phenolic acids</b> | <b>58.89 ± 9.6 a</b> | <b>24.137.9</b><br><b>1 ± 0 ±</b><br><b>5.2 11.2</b><br><b>c b</b> | <b>37.05 ± 3.6 a</b> | <b>11.730.6</b><br><b>6 ± 0 ±</b><br><b>1.0 2.6</b><br><b>c b</b> | <b>37</b> | <b>51 19</b>          |

**Table S5.** Phenolic acids content (mean ± SE, in mg/kg) and decrease (%) in coffees during successive extractions with different solvents (W: water, M: methanol; W:M water:methanol mix). Different letters in the table indicate statistical significance ( $p \leq 0.05$ ) in phenolic content between solvents.

|                          | First extraction (mg/kg) |             |             | Second extraction (mg/kg) |     |         | DECREASE (%) |     |         |
|--------------------------|--------------------------|-------------|-------------|---------------------------|-----|---------|--------------|-----|---------|
|                          | W                        | M           | W:<br>M     | W                         | M   | W:<br>M | W            | M   | W:<br>M |
| <b>INSTANT COFFEE</b>    |                          |             |             |                           |     |         |              |     |         |
| 3-p-coumaroylquinic acid | 0.06 ± 0.01 a            | 0.03 ± 0.00 | 0.04 ± 0.00 | n.a                       | n.a | n.a     | n.a          | n.a | n.a     |
| 4-p-coumaroylquinic acid | 0.14 ± 0.02 c            | 0.02 ± 0.00 | 0.16 ± 0.00 | n.a                       | n.a | n.a     | n.a          | n.a | n.a     |
| 3-caffeoylquinic acid 1  | 4.44 ± 0.15 a            | 0.11 ± 0.01 | 0.11 ± 0.01 | n.a                       | n.a | n.a     | n.a          | n.a | n.a     |
| 3-caffeoylquinic acid 2  | 1.99 ± 0.43 a            | 0.08 ± 0.00 | 0.16 ± 0.00 | n.a                       | n.a | n.a     | n.a          | n.a | n.a     |
| 4-caffeoylquinic acid    | 5.81 ± 0.23 a            | 0.11 ± 0.01 | 0.22 ± 0.01 | n.a                       | n.a | n.a     | n.a          | n.a | n.a     |
| 5-caffeoylquinic acid    | 5.44 ± 0.02 c            | 0.42 ± 0.01 | 0.76 ± 0.01 | n.a                       | n.a | n.a     | n.a          | n.a | n.a     |
| Dicaffeoylquinic acid 1  | 0.39 ± 0.03 b            | 0.03 ± 0.00 | 0.02 ± 0.00 | n.a                       | n.a | n.a     | n.a          | n.a | n.a     |
| Dicaffeoylquinic acid 2  | 0.48 ± 0.02 a            | 0.02 ± 0.00 | 0.02 ± 0.00 | n.a                       | n.a | n.a     | n.a          | n.a | n.a     |
| Dicaffeoylquinic acid 3  | 0.35 ± 0.02 a            | 0.02 ± 0.00 | 0.02 ± 0.00 | n.a                       | n.a | n.a     | n.a          | n.a | n.a     |
| Dicaffeoylquinic acid 4  | 0.44 ± 0.02 a            | 0.03 ± 0.00 | 0.03 ± 0.00 | n.a                       | n.a | n.a     | n.a          | n.a | n.a     |
| Dicaffeoylquinic lactone | 0.73 ± 0.02 c            | 0.24 ± 0.01 | 0.09 ± 0.01 | n.a                       | n.a | n.a     | n.a          | n.a | n.a     |
| 3-feruloylquinic acid    | 0.24 ± 0.009 a           | 0.12 ± 0.01 | 0.14 ± 0.01 | n.a                       | n.a | n.a     | n.a          | n.a | n.a     |

|                             |                      |                                    |                 |                                                  |            |            |            |
|-----------------------------|----------------------|------------------------------------|-----------------|--------------------------------------------------|------------|------------|------------|
|                             |                      | 0.00 0.00                          |                 |                                                  |            |            |            |
|                             |                      | 5 b 9 b                            |                 |                                                  |            |            |            |
|                             |                      | 3.99 4.11                          |                 |                                                  |            |            |            |
| 4-feruloylquinic acid       | 1.76 ± 0.06 b        | ± ±<br>0.21 0.26<br>a a            | n.a             | n.a n.a                                          | n.a        | n.a        | n.a        |
|                             |                      | 0.02 0.03                          |                 |                                                  |            |            |            |
| 5-feruloylquinic acid       | 0.02 ± 0.004 a       | ± ±<br>0.01 0.00<br>a 4 a          | n.a             | n.a n.a                                          | n.a        | n.a        | n.a        |
|                             |                      | 25.0 28.4                          |                 |                                                  |            |            |            |
| <b>Total phenolic acids</b> | <b>22.29 ± 1.0 c</b> | <b>5 ± 2 ±<br/>1.3 1.7<br/>b a</b> | <b>n.a</b>      | <b>n.a n.a</b>                                   | <b>n.a</b> | <b>n.a</b> | <b>n.a</b> |
| <b>STANDARD COFFEE</b>      |                      |                                    |                 |                                                  |            |            |            |
|                             |                      | 0.00 0.00                          |                 |                                                  |            |            |            |
| 3-p-coumaroylquinic acid    | 0.01 ± 0.001 a       | 7 ± 9 ±<br>0.00 0.00<br>01 b 1 b   | 0.008 ± 0.001 b | 0.00 0.00<br>4 ± 5 ±<br>0.00 0.00<br>3 b 2<br>ab | 20         | 43 44      |            |
|                             |                      | 0.07 0.02                          |                 |                                                  |            |            |            |
| 4-p-coumaroylquinic acid    | 0.06 ± 0.005 b       | ± ±<br>0.00 0.00<br>2 a 4 c        | 0.03 ± 0.004 a  | ± ±<br>0.00 0.00<br>3 a 3 a                      | 50         | 43 -50     |            |
|                             |                      | 0.89 2.19                          |                 |                                                  |            |            |            |
| 3-caffeoylquinic acid 1     | 3.13 ± 0.41 a        | ± ±<br>0.02 0.36<br>b a            | 0.98 ± 0.07 b   | ± ±<br>0.08 0.32<br>b a                          | 69         | 20 13      |            |
|                             |                      | 0.24 0.31                          |                 |                                                  |            |            |            |
| 3-caffeoylquinic acid 2     | 0.50 ± 0.05 a        | ± ±<br>0.00 0.03<br>5 b b          | 0.26 ± 0.03 a   | ± ±<br>0.01 0.05<br>b ab                         | 48         | 46 39      |            |
|                             |                      | 1.08 2.57                          |                 |                                                  |            |            |            |
| 4-caffeoylquinic acid       | 3.69 ± 0.46 a        | ± ±<br>0.05 0.33<br>c b            | 1.40 ± 0.10 b   | ± ±<br>0.00 0.29<br>8 b a                        | 62         | 10 23      |            |
|                             |                      | 6.79 16.3                          |                 |                                                  |            |            |            |
| 5-caffeoylquinic acid 1     | 6.13 ± 0.73 b        | ± 2 ±<br>0.21 1.91<br>b a          | 2.32 ± 0.15 c   | ± 4 ±<br>0.56 1.84<br>b a                        | 62         | 6 19       |            |
|                             |                      | 0.12 0.07                          |                 |                                                  |            |            |            |
| 5-caffeoylquinic acid 2     | 0.13 ± 0.02 a        | ± ±<br>0.00 0.02<br>2 a b          | 0.07 ± 0.008 a  | ± ±<br>0.00 0.00<br>4 b 7 a                      | 46         | 58 0       |            |
|                             |                      | 0.29 0.19                          |                 |                                                  |            |            |            |
| Dicaffeoylquinic acid 1     | 0.26 ± 0.02 ab       | ± ±<br>0.02 0.03<br>a b            | 0.18 ± 0.02 a   | ± ±<br>0.01 0.00<br>a 9 a                        | 31         | 52 26      |            |
|                             |                      | 0.36 0.42                          |                 |                                                  |            |            |            |
| Dicaffeoylquinic acid 2     | 0.59 ± 0.06 a        | ± ±                                | 0.42 ± 0.05 a   | 0.29 0.37<br>± ±                                 | 29         | 19 12      |            |

|                                   |                      |                                                                       |  |                                                                        |           |                      |
|-----------------------------------|----------------------|-----------------------------------------------------------------------|--|------------------------------------------------------------------------|-----------|----------------------|
|                                   |                      | 0.01 0.05<br>b a<br>0.31 0.33<br>± ±<br>0.01 0.05<br>b b<br>0.49 0.53 |  | 0.01 0.03<br>b ab<br>0.24 0.29<br>± ±<br>0.02 0.02<br>a a<br>0.36 0.47 |           |                      |
| Dicaffeoylquinic acid 3           | 0.45 ± 0.04 a        | 0.32 ± 0.04 a                                                         |  |                                                                        | 29        | 23 12                |
| Dicaffeoylquinic acid 4           | 0.67 ± 0.06 a        | 0.45 ± 0.06 a                                                         |  |                                                                        | 33        | 27 11                |
| Dicaffeoylquinic lactone          | 0.58 ± 0.06 c        | 0.33 ± 0.04 b                                                         |  |                                                                        | 43        | 48 -3                |
| 3-feruloylquinic acid             | 0.15 ± 0.02 a        | 0.06 ± 0.004 b                                                        |  |                                                                        | 60        | 0 25                 |
| 4-feruloylquinic acid             | 0.59 ± 0.06 b        | 0.33 ± 0.04 c                                                         |  |                                                                        | 44        | 41 13                |
| 5-feruloylquinic acid             | 0.009 ± 0.0009 b     | 0.09 ± 0.02 a                                                         |  |                                                                        | -900      | - -<br>30 265<br>0 0 |
| <b>Total phenolic acids</b>       | <b>16.95 ± 2.0 b</b> | <b>7.25 ± 0.6</b>                                                     |  |                                                                        | <b>57</b> | <b>23 16</b>         |
| <b>INTENSE COFFEE</b>             |                      |                                                                       |  |                                                                        |           |                      |
| 3- <i>p</i> -coumaroylquinic acid | traces               | traces                                                                |  | traces                                                                 |           |                      |
| 4- <i>p</i> -coumaroylquinic acid | 0.07 ± 0.005 a       | 0.009 ± 0.0005 ab                                                     |  |                                                                        | 87        | 73 80                |
| 3-caffeoylquinic acid 1           | 0.47 ± 0.03 a        | 0.11 ± 0.007 a                                                        |  |                                                                        | 77        | 40 52                |
| 3-caffeoylquinic acid 2           | 1.99 ± 0.43 a        | 0.08 ± 0.05 b                                                         |  |                                                                        | 96        | 96 89                |
| 4-caffeoylquinic acid             | 0.53 ± 0.03 a        | 0.13 ± 0.007 a                                                        |  |                                                                        | 75        | 60 54                |
| 5-caffeoylquinic acid             | 0.82 ± 0.05 b        | 0.18 ± 0.01 b                                                         |  |                                                                        | 78        | 43 52                |



|                          |                 |                       |                |                       |      |               |
|--------------------------|-----------------|-----------------------|----------------|-----------------------|------|---------------|
|                          |                 | 0.03 0.19<br>c a      |                | 0.01 0.15<br>b a      |      |               |
|                          |                 | 0.42 0.08<br>± ±      |                | 0.01 0.10<br>± ±      |      |               |
| Dicaffeoylquinic acid 2  | 0.12 ± 0.01 a   | 0.00 0.00<br>7 c 7 b  | 0.08 ± 0.009 a | 0.00 0.02<br>4 b a    | 33   | 98 -25        |
|                          |                 | 0.04 0.08<br>± ±      |                | 0.01 0.09<br>± ±      |      |               |
| Dicaffeoylquinic acid 3  | 0.13 ± 0.009 a  | 0.02 0.00<br>c 6 b    | 0.07 ± 0.009 a | 0.00 0.02<br>3 b a    | 46   | 75 -13        |
|                          |                 | 0.06 0.12<br>± ±      |                | 0.02 0.13<br>± ±      |      |               |
| Dicaffeoylquinic acid 4  | 0.18 ± 0.01 a   | 0.01 0.01<br>c b      | 0.09 ± 0.01 a  | 0.00 0.22<br>1 b a    | 50   | 67 -8         |
|                          |                 | 0.85 0.94<br>± ±      |                | 0.29 0.56<br>± ±      |      |               |
| Dicaffeoylquinic lactone | 0.27 ± 0.02 b   | 0.07 0.09<br>a a      | 0.09 ± 0.006 c | 0.03 0.08<br>b a      | 67   | 66 40         |
|                          |                 | 0.04 0.01<br>± ±      |                | trac trac<br>es es    |      |               |
| 3-feruloylquinic acid    | 0.02 ± 0.001 a  | 0.00 0.00<br>02 c 1 b | traces         |                       |      |               |
|                          |                 | 0.23 0.67<br>± ±      |                | 0.12 0.23<br>± ±      |      |               |
| 4-feruloylquinic acid    | 0.23 ± 0.01 b   | 0.00 0.06<br>8 b a    | 0.03 ± 0.002 c | 0.00 0.03<br>9 b a    | 87   | 48 66         |
|                          |                 | 0.00 0.00<br>4 ± 8 ±  |                | 0.00 0.04<br>7 ± ±    |      |               |
| 5-feruloylquinic acid    | 0.01 ± 0.0008 a | 0.00 0.00<br>2 c 07 b | 0.02 ± 0.005 b | 0.00 0.00<br>08 b 6 a | -100 | - -<br>75 400 |
|                          |                 | 3.16 6.17<br>± ±      |                | 0.82 2.68<br>± ±      |      |               |
| Total phenolic acids     | 4.84 ± 0.6 b    | 0.2 0.6<br>c a        | 0.89 ± 0.1 b   | 0.5 0.6<br>b a        | 82   | 74 57         |
